# Supplementary material for: A cluster randomized controlled trial aimed at implementation of local quality improvement collaboratives to improve prescribing and test ordering performance of general practitioners: Study Protocol
Source: PubMed Central journal article supplement (PMC2656449; doi:10.1186/1748-5908-4-6), 2009-02-17
Supplement: 1748-5908-4-6-S3.pdf [file 1748-5908-4-6-S3.pdf]

| Module              | Drug                                                   | ATC-code | Label at feedback form                  |
|---------------------|--------------------------------------------------------|----------|-----------------------------------------|
| diabetes type 2     | metformin                                              | A10BA02  | metformin                               |
|                     | glicazide                                              | A10BB09  | glicazide                               |
|                     | glimepiride                                            | A10BB12  | glimepiride                             |
|                     | tolbutamide                                            | A10BB03  | tolbutamide                             |
|                     | glibenclamide                                          | A10BB01  | glibenclamide                           |
|                     | rosiglitazone                                          | A10BG02  | rosiglitazone                           |
|                     | pioglitazone                                           | A10BG03  | pioglitazone                            |
|                     | repaglinide                                            | A10BX02  | other oral blood glucose lowering drugs |
|                     | acarbose                                               | A10BF01  | other oral blood glucose lowering drugs |
|                     | glimepiride/rosiglitazone                              | A10BD04  | combinations, oral                      |
|                     | metformin/glibenclamide                                | A10BD02  | combinations, oral                      |
|                     | metformin/rosiglitazone                                | A10BD03  | combinations, oral                      |
|                     | insulin, fast-acting                                   | A10AB    | insulin, fast-acting                    |
|                     | insulin, intermediate-acting                           | A10AC    | Insulin, intermediate-acting            |
|                     | insulin, intermediate-acting combined with long-acting | A10AD    | insulin mix                             |
|                     | insulin, long-acting                                   | A10AE    | insulin, long-acting                    |
|                     |                                                        |          |                                         |
| dyspepsia           | magnesium compounds                                    | A02AA    | antacids                                |
|                     | aluminium compounds                                    | A02AB    | antacids                                |
|                     | combinations and complexes of al- ca- en mg- compounds | A02AD    | antacids                                |
|                     | antacids with sodium bicarbonates                      | A02AH    | antacids                                |
|                     | famotidine                                             | A02BA03  | other H2-antagonists                    |
|                     | ranitidine                                             | A02BA02  | ranitidine                              |
|                     | cimetidine                                             | A02BA01  | other H2-antagonists                    |
|                     | nizatidine                                             | A02BA04  | other H2-antagonists                    |
|                     | omeprazole                                             | A02BC01  | omeprazole                              |
|                     | pantoprazole                                           | A02BC02  | pantoprazole                            |
|                     | lansoprazole                                           | A02BC03  | lansoprazole                            |
|                     | rabeprazole                                            | A02BC04  | rabeprazole                             |
|                     | esomeprazole                                           | A02BC05  | esomeprazole                            |
|                     | misoprostol                                            | A02BB01  | misoprostol                             |
|                     | Pantopac ®                                             | A02BD04  | Pantopac ®                              |
|                     |                                                        |          |                                         |
| anaemia             | ferrous sulfate                                        | B03AA07  | ferrous sulfate                         |
|                     | ferrous fumarate                                       | B03AA02  | ferrous fumarate                        |
|                     | ferrous gluconate                                      | B03AA03  | ferrous gluconate                       |
|                     | ferrous chloride                                       | B03AA05  | ferrous chloride                        |
|                     | cyanocobalamin                                         | B03BA01  | vitamin B12                             |
|                     | hydroxocobalamin                                       | B03BA03  | vitamin B12                             |
|                     | folic acid                                             | B03BB01  | folic acid                              |
|                     |                                                        |          |                                         |
| chlamydia           | Doxycycline                                            | J01AA02  | doxycycline                             |
|                     | azithromycin                                           | J01FA10  | azithromycin                            |
|                     | amoxicillin                                            | J01CA04  | amoxicillin                             |
|                     | erythromycin                                           | J01FA01  | erythromycin                            |
|                     |                                                        |          |                                         |
| prostate complaints | alfuzosin                                              | G04CA01  | alfuzosin                               |
|                     | tamsulosin                                             | G04CA02  | tamsulosin                              |
|                     | doxazosin                                              | C02CA04  | other alpha-adrenoreceptor antagonists  |
|                     | terazosin                                              | G04CA03  | other alpha-adrenoreceptor antagonists  |
|                     | prazosin                                               | C02CA01  | other alpha-adrenoreceptor              |

|                      |                                      |         |                               |
|----------------------|--------------------------------------|---------|-------------------------------|
|                      |                                      |         | antagonists                   |
|                      | finasteride                          | G04CB01 | finasteride                   |
|                      | dutasteride                          | G04CB02 | dutasteride                   |
|                      |                                      |         |                               |
| rheumatic complaints | phenylbutazone                       | M01AA01 | other NSAIDs                  |
|                      | indometacin                          | M01AB01 | indomethacine                 |
|                      | diclofenac                           | M01AB05 | diclofenac                    |
|                      | sulindac                             | M01AB02 | other NSAIDs                  |
|                      | aceclofenac                          | M01AB16 | other NSAIDs                  |
|                      | meloxicam                            | M01AC06 | preferential cox-2 inhibitors |
|                      | piroxicam                            | M01AC01 | other NSAIDs                  |
|                      | tenoxicam                            | M01AC02 | other NSAIDs                  |
|                      | ibuprofen                            | M01AE01 | ibuprofen                     |
|                      | naproxen                             | M01AE02 | naproxen                      |
|                      | ketoprofen                           | M01AE03 | other NSAIDs                  |
|                      | flurbiprofen                         | M01AE09 | other NSAIDs                  |
|                      | tiaprofenic acid                     | M01AE11 | other NSAIDs                  |
|                      | dexibuprofen                         | M01AE14 | other NSAIDs                  |
|                      | dexketoprofen                        | M01AE17 | other NSAIDs                  |
|                      | tolfenamic acid                      | M01AG02 | other NSAIDs                  |
|                      | azapropazone                         | M01AX04 | other NSAIDs                  |
|                      | diflusal                             | N02BA11 | other NSAIDs                  |
|                      | metamizole sodium                    | N02BB02 | other NSAIDs                  |
|                      | celecoxib                            | M01AH01 | coxibs                        |
|                      | etoricoxib                           | M01AH05 | coxibs                        |
|                      | nabumetone                           | M01AX01 | preferential cox-2 inhibitors |
|                      | diclofenac + misoprostol             | M01AB55 | diclofenac+ misoprostol       |
|                      | sulfasalazine (text no feedback)     | A07EC01 | DMARDs                        |
|                      | methotrexate (text no feedback)      | L01BA01 | DMARDs                        |
|                      | leflunomide (text no feedback)       | L04AA13 | DMARDs                        |
|                      | etanercept (text no feedback)        | L04AA11 | DMARDs                        |
|                      | infliximab (text no feedback)        | L04AA12 | DMARDs                        |
|                      | gold preparations (text no feedback) | M01CB   | DMARDs                        |
|                      | penicillamine (text no feedback)     | M01CC01 | DMARDs                        |
|                      | chloroquine (text no feedback)       | P01BA01 | DMARDs                        |
|                      | azathioprine (text no feedback)      | L04AX01 | DMARDs                        |
|                      | ciclosporin (text no feedback)       | L04AD01 | DMARDs                        |
|                      |                                      |         |                               |
| thyroid disease      | levothyroxine sodium                 | H03AA01 | levothyroxine                 |
|                      | liothyronine sodium                  | H03AA02 | liothyronine                  |
|                      | thiamazole                           | H03BB02 | thiamazole                    |
|                      |                                      |         |                               |
| UTI                  | nitrofurantoin                       | J01XE01 | nitrofurantoin                |
|                      | trimethoprim                         | J01EA01 | trimethoprim                  |
|                      | fosfomycin                           | J01XX01 | fosfomycin                    |
|                      | amoxicillin and enzyme inhibitor     | J01CR02 | amoxicillin/enzyme inhibitor  |
|                      | sulfamethoxazole and trimethoprim    | J01EE01 | co-trimoxazole                |
|                      | norfloxacin                          | J01MA06 | norfloxacin                   |
|                      | ciprofloxacin                        | J01MA02 | ciprofloxacin                 |
|                      |                                      |         |                               |
| dyslipidaemia        | simvastatin                          | C10AA01 | simvastatin                   |
|                      | pravastatin                          | C10AA03 | pravastatin                   |
|                      | atorvastatin                         | C10AA05 | atorvastatin                  |
|                      | fluvastatin                          | C10AA04 | fluvastatin                   |
|                      | rosuvastatin                         | C10AA07 | rosuvastatin                  |
|                      | bezafibrate                          | C10AB02 | fibrates                      |
|                      | gemfibrozil                          | C10AB04 | fibrates                      |

|                           |                                                           |         |                             |
|---------------------------|-----------------------------------------------------------|---------|-----------------------------|
|                           | ciprofibrate                                              | C10AB08 | fibrates                    |
|                           | acipimox                                                  | C10AD06 | nicotinic acid (-analogue)  |
|                           | ezetimibe                                                 | C10AX09 | ezetimibe                   |
|                           | xantinol nicotinate                                       | C04AD02 | nicotinic acid (analogue)   |
|                           | nicotinic acid                                            | C10AD02 | nicotinic acid (analogue)   |
|                           | colestyramine                                             | C10AC01 | colestyramine               |
|                           | ezetimibe / simvastatin                                   | C10AX   | combinations                |
|                           |                                                           |         |                             |
| perimenopausal complaints | estradiol                                                 | G03CA03 | estrogen monotherapy        |
|                           | estriol                                                   | G03CA04 | estrogen monotherapy        |
|                           | ethinylestradiol                                          | G03CA01 | estrogen monotherapy        |
|                           | conjugated estrogens                                      | G03CA57 | estrogen monotherapy        |
|                           | prostagens and estrogens, fixed comb.                     | G03AA   | oral contraceptives, >50 yr |
|                           | prostagens and estrogens, fixed comb.                     | G03AB   | oral contraceptives, >50 yr |
|                           | prostagens and estrogens, fixed comb.                     | G03AC   | oral contraceptives, >50 yr |
|                           | prostagens and estrogens, fixed comb.                     | G03BB01 | oral contraceptives, >50 yr |
|                           | estrogen/cyproterone (Climene '28' ®)                     | G03HB01 | combinations with estrogens |
|                           | estrogen/drospirenone (Angeliq ®)                         | G03FA17 | combinations with estrogens |
|                           | estrogen/dydrogesterone, sequential (Femoston®)           | G03FB08 | combinations with estrogens |
|                           | estrogen/dydrogesterone, fixed (Femoston continu ®)       | G03FA14 | combinations with estrogens |
|                           | estrogen/norethisterone, sequential (Trisequens ®)        | G03FB05 | combinations with estrogens |
|                           | estrogen /norethisterone, fixed (Activelle ®, Kliogest ®) | G03FA01 | combinations with estrogens |
|                           | estrogen /norethisterone, patch (Estracomb TTS ®)         | G03FB05 | combinations with estrogens |
|                           | clonidine                                                 | C02AC01 | clonidine                   |
|                           | tibolone                                                  | G03CX01 | tibolone                    |
